# Supplementary material
Source: Springer Nature journal article supplement (https://www.springermedizin.de/resource/supplementary/12931_2011_1131_MOESM1_ESM.pdf/9425382)

**A**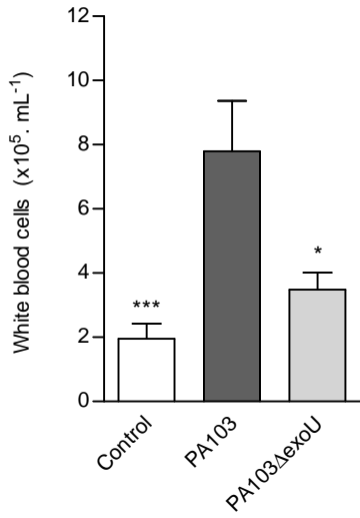**B**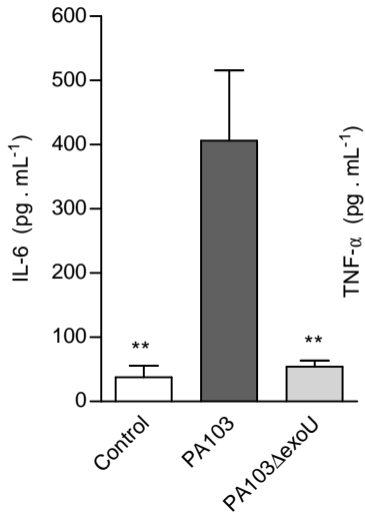**C**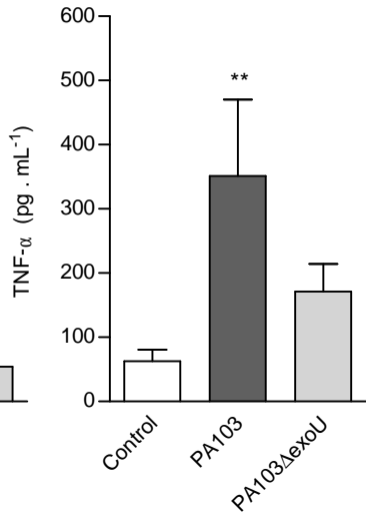

Supplement: MOESM1 [file 9425382]
